# Supplementary material
Source: publisher figshare collection journal article supplement (https://gsapubs.figshare.com/ndownloader/files/24850553)
Supplement: Supplementary file 1 [file 24850553]

## Sheet: Sheet1
Supplemental Material for Ashworth, A.C., Thackray, G.D., and Gavin, D.G., 2020, Climate of the Last Glacial Maximum on the western Olympic Peninsula
based on insect paleoecology, palynology, and glacial geology, in Waitt, R.B., Thackray, G.D., and Gillespie, A.R., eds., Untangling the Quaternary Period:
A Legacy of Stephen C. Porter: Geological Society of America Special Paper 548, https://doi.org/10.1130/2020.2548(06).
S5. Localities, Mjan, Mjul temperatures for Olophrum boreale
LONG	LAT	Mjan	Mjul
-110.896	40.784	-6.5	13.1
-110.82	41.002	-6.2	15.1
-107.516	44.764	-9.3	12.5
-107.467	44.768	-9	13
-109.543	44.945	-10.5	9.6
-109.486	44.959	-10.4	8.7
-109.91	45.121	-11	9.2
-124.383	47.6343	5.3	14.7
-66.083	48.783	-14.9	15.4
-120.996	49.372	-5.8	10.1
-64.166	50.264	-15.3	14.8
-114.992	50.593	-10.9	8.1
-99.973	50.631	-19.5	17.1
-99.986	50.66	-19.3	17.2
-99.641	50.666	-18.2	16.4
-100.018	50.706	-18.1	16.7
-100.25	50.739	-19.1	17
-99.981	50.795	-18.1	16.5
-115.165	50.806	-10.8	12.3
-115.136	50.891	-9.7	12.8
-115.053	51.024	-8.6	13
-118.072	51.071	-9.5	10.5
-118.107	51.08	-8.1	9.9
-115.578	51.178	-9.7	13.5
-116.154	51.315	-13.1	10
-116.241	51.321	-12.7	8.9
-116.188	51.322	-13.3	10.6
-116.337	51.355	-13	9.8
-116.306	51.355	-12.7	8.7
-116.374	51.371	-12.8	9.6
-116.244	51.415	-13.3	10.5
-116.073	51.473	-11.7	8.3
-116.076	51.484	-11.9	8.1
-116.687	51.578	-13	10.4
-116.48	51.673	-13.5	9.8
-116.413	51.685	-12.4	7.8
-78.643	52.54	-20.7	12.9
-113.602	52.658	-13.1	16.2
-119.128	52.687	-7.5	7.9
-118.085	53.704	-9.1	12.4
-110.825	54.264	-16.7	16.7
-120.952	56.281	-13.1	15.3
-122.499	57.035	-12.1	13
-170.257	57.177	-3.5	8.6
-124.662	58.65	-14.4	9.2
-94.101	58.759	-26.9	12.1
-125.766	59.007	-15.5	11
-111.609	59.862	-23.4	16.3
-132.019	59.954	-19.1	13.1
-132.112	60.005	-19.1	12.6
-131.061	60.031	-18.4	11.5
-136.473	60.089	-14.4	9.1
-149.543	60.534	-7.8	13.1
-115.724	60.842	-22.8	16.3
-138.792	61.256	-20.3	12.3
-139.136	61.373	-20.8	12.7
-149.309	61.77	-9.4	9.6
-99.661	61.91	-30.4	12.8
-113.52	61.999	-25.7	15.7
-120.35	62.3	-22.7	13.9
-140.844	62.34	-27.1	14
-150.089	62.725	-9.9	11.9
-150.124	62.743	-11.6	13.7
-141.508	62.884	-27.5	14.9
-149.408	63.086	-11.6	10.1
-146.44	63.092	-18.8	11.7
-146.656	63.099	-17.9	11.5
-145.715	63.312	-17.7	11.9
-170.025	63.325	-14.1	9
-148.159	63.565	-15.2	10.9
-142.334	63.613	-23.1	13.3
-135.481	63.698	-24.5	14.7
-160.783	63.874	-15.8	12.1
-135.2	63.911	-21.5	11
-135.476	63.968	-24.6	13.8
-138.972	64.062	-26.6	14.4
-135.355	64.104	-24.4	13.6
-138.41	64.351	-24.2	12.4
-138.218	64.503	-23.3	11.3
-138.215	64.541	-21.2	9.6
-138.253	64.582	-21.1	9.6
-138.364	64.609	-22.4	10.3
-138.374	64.639	-22.8	10.9
-138.364	64.777	-24.5	11.7
-147.764	64.884	-21.3	16.3
-138.274	64.894	-25.7	12.2
-138.268	64.94	-24.8	12
-138.139	65.016	-23.6	11.5
-126.812	65.289	-25.7	14.6
-138.132	65.629	-27.3	14.4
-149.316	65.667	-23.1	15.4
-118.931	65.718	-27.9	14.3
-137.767	65.825	-25.8	13.6
-137.704	65.845	-25.3	13.2
-137.557	65.853	-26	13.8
-149.866	65.866	-23.6	16.1
-137.547	65.884	-25.9	13.6
-137.491	65.924	-25.9	13.7
-118.021	66.093	-26.9	11.4
-136.866	66.242	-25.1	13.6
-136.71	66.443	-28.1	14.8
-150.833	66.533	-24.2	15.2
-115.002	66.579	-30.1	12.9
-150.416	66.583	-22.7	14.2
-150.666	66.666	-23.6	15.7
-150.116	67.2	-21.7	12.6
-150.166	67.266	-23.1	13.6
-150.083	67.416	-24.6	13.8
-124.65	67.438	-27.3	13.5
-149.75	67.666	-24.2	13.1
-115.128	67.824	-28.4	10.4
-135.02	68.221	-27.2	13.1
-149.429	68.254	-22.6	8.3
-133.71	68.35	-27.7	14.5
-134.065	68.577	-27.6	13.9
-149.5	68.583	-22.3	10.9
-134.135	68.69	-26.9	13.5
-133.03	69.443	-26.8	10.5
